Sequence analysis

# MM-6mAPred: identifying DNA N6-methyladenine sites based on Markov model

Cong Pian <sup>1,2</sup>, Guangle Zhang<sup>3</sup>, Fei Li<sup>2,\*</sup> and Xiaodan Fan <sup>1,\*</sup>

<sup>1</sup>Department of Statistics, The Chinese University of Hong Kong, Sha Tin, Hong Kong, <sup>2</sup>State Key Laboratory of Rice Biology and Ministry of Agricultural and Rural Affairs, Key Laboratory of Molecular Biology of Crop Pathogens and Insect Pests, Institute of Insect Sciences, Zhejiang University, Hangzhou 310058, China and <sup>3</sup>Binjiang College, Nanjing University of Information Science and Technology, Jiangsu 214105, China

\*To whom correspondence should be addressed.

Associate Editor: John Hancock

Received on March 23, 2019; revised on June 29, 2019; editorial decision on July 5, 2019; accepted on July 9, 2019

## Abstract

**Motivation:** Recent studies have shown that DNA N6-methyladenine (6mA) plays an important role in epigenetic modification of eukaryotic organisms. It has been found that 6mA is closely related to embryonic development, stress response and so on. Developing a new algorithm to quickly and accurately identify 6mA sites in genomes is important for explore their biological functions.

**Results:** In this paper, we proposed a new classification method called MM-6mAPred based on a Markov model which makes use of the transition probability between adjacent nucleotides to identify 6mA site. The sensitivity and specificity of our method are 89.32% and 90.11%, respectively. The overall accuracy of our method is 89.72%, which is 6.59% higher than that of the previous method i6mA-Pred. It indicated that, compared with the 41 nucleotide chemical properties used by i6mA-Pred, the transition probability between adjacent nucleotides can capture more discriminant sequence information.

**Availability and implementation:** The web server of MM-6mAPred is freely accessible at <http://www.insect-genome.com/MM-6mAPred/>

**Contact:** lifei18@zju.edu.cn or xfan@cuhk.edu.hk

**Supplementary information:** [Supplementary data](#) are available at *Bioinformatics* online.

## 1 Introduction

Epigenetic modification can regulate gene expression without altering DNA sequences. At present, confirmed epigenetic phenomena include DNA methylation, RNA methylation, genomic imprinting, gene silencing, RNA editing, maternal effect, transposon activation and so on. Among them, DNA methylation is the most important modification for epigenetic regulation of gene expression. DNA N6-methyladenine (6mA) refers to the methylation of the N6 position of adenine, which has been found to play an important role in the epigenetic modification of DNA in eukaryotes in recent years. This modification has been shown to be associated with germ cell differentiation, stress response, embryonic development, nervous system and other processes (Liu *et al.*, 2016; Yao *et al.*, 2017; Zhang *et al.*, 2015).

DNA 6mA was initially identified in *Escherichia coli* and then found in several other bacteria (Janulaitis *et al.*, 1983). Researchers once believed that 6mA existed only in prokaryotes and single-cell organisms. In 1966, Unger and Venner (1996) detected the presence of 6mA in bovine and human sperm cells, but the results could not be well replicated. With the development of biotechnology, 6mA was found in *Chlamydomonas*, *Nematodes* and *Drosophila* in 2015, and its functions were identified (Fu *et al.*, 2015; Greer *et al.*, 2015; Zhang *et al.*, 2015).

In 2016, the study of 6mA modification of mouse embryos was published in Nature (Wu *et al.*, 2016). In 2018, a team from the Sun Yat-sen University used sequencing technologies to map the 6mA of Chinese DNA for the first time (Xiao *et al.*, 2018). In the same year, Zhou *et al.* (2018) analyzed the distribution of 6mA sites in the rice

genome by multiple sequencing methods, such as 6mA-IP-Seq, liquid chromatograph-mass spectrometer (LC-MS/MS) and single-molecule and real-time sequencing (SMRT). Although the expression abundance of DNA 6mA is very low, recent studies on 6mA have shown that the modification is closely related to gene transcription regulation.

SMRT is the mainstream experimental technique for identifying m6A sites. However, the technology cannot detect m6A sites from the whole genome, and the cost of the technique is high. Thus, it is particularly important to develop efficient algorithms for identifying DNA 6mA sites computationally. To date, there are many methods to predict methylation modification of 5-methylcytosine. However, there is only one identification method for 6mA methylation modification. Chen *et al.* (2019) developed a method named i6mA-Pred for identifying DNA 6mA sites. Their method used a support vector machine (SVM) classifier based on chemical features of nucleotides and position-specific nucleotide frequencies. However, the association information among nucleotides near 6mA sites is ignored. We find that the transition probabilities between neighboring bases in 6mA sequences and non-6mA sequences are significantly different. Based on this finding, we introduce a novel method named MM-6mAPred based on a Markov model (MM) to identify DNA 6mA sites. In fact, neighboring dependency among biological sequences has long been modeled through Markov chain models (Almagor, 1983; Borodovsky *et al.*, 1995; Durbin *et al.*, 1998; Ohler *et al.*, 1999; Reese *et al.*, 1997; Wren *et al.*, 2005; Yakhnenko *et al.*, 2005 and so on). Researchers have also shown that some basic biological and chemical features of nucleic acids stand behind the frequencies of dinucleotides (Almagor, 1983). However, up to our knowledge, MM-6mAPred is the first tool for identifying 6mA sites using this neighboring dependency information. The results show that the performance of MM-6mAPred is significantly better than that of i6mA-Pred.

## 2 Materials and methods

### 2.1 Dataset

For the convenience of the comparison between the existing method i6mA-Pred and our method, we used the same experimental benchmark data that i6mA-Pred used (Chen *et al.*, 2019; Zhou *et al.*, 2018). In summary, 880 positive sequences containing 6mA sites and 880 negative sequences containing no 6mA sites from the rice genome were downloaded from <http://lin-group.cn/server/i6mAPred/data>. Each sequence contains 41 nucleotides (nt) with the adenine of interest in the center.

### 2.2 Construction of MM

A MM is a stochastic process where the next variable only depends on the most recent variable(s) instead of all the previous variables. The most commonly used MM in DNA sequence analyses is the first-order Markov chain, where the next nucleotide will solely depend on the current nucleotide. In this study, we model the sequence of 6mA site as a first-order Markov chain. More specifically, let  $N_t \in (A, G, C, T)$  be the random variable at the  $t$ -th location of the sequence of length  $L$ . The MM assumes that  $P(N_t|N_{t-1}, N_{t-2}, \dots, N_1) = P(N_t|N_{t-1})$  for  $t = 2, 3, \dots, L$ . Figure 1 shows the flow chart for identifying sequences containing 6mA sites by MM-6mAPred. From the 6mA sequences in the training dataset, we estimate  $P_{N_1}^P$ , which is the probability vector that the nucleotide  $N_1$  shows up at the initial position, and  $T_P^1, T_P^2, \dots, T_P^{L-1}$ , which are the transition probability matrices of  $N_1 \rightarrow N_2, N_2 \rightarrow N_3, \dots, N_{L-1} \rightarrow N_L$ ,

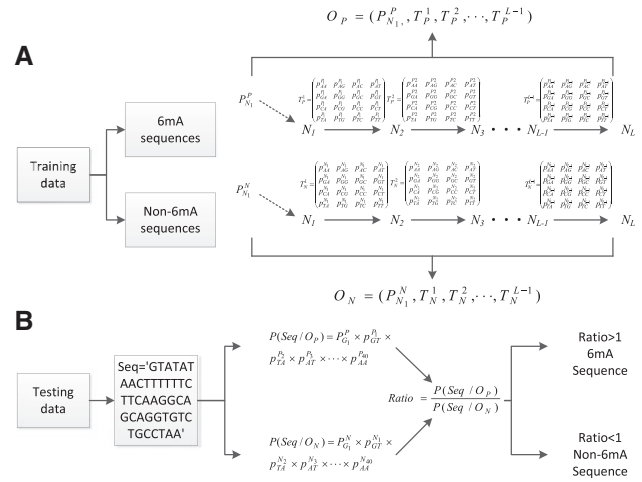

**Fig. 1.** The flow chart for identifying 6mA sequences by MM-6mAPred. (A) The construction of two MMs ( $O_P$  and  $O_N$ ) based on DNA 6mA sequence and non-6mA sequence. (B) The prediction for a test sequence. The sequence 'GTATATAACTTTTTTCTCAAGGCAGCAGGTGTCTGC CTA A' is used as an example to explain the prediction process

respectively. Similarly, for non-6mA sequences,  $P_{N_1}^N$  is the initial distribution of nucleotides,  $T_N^1, T_N^2, \dots, T_N^{L-1}$  are the corresponding transition probabilities. Therefore, two MMs  $O_P = (P_{N_1}^P, T_P^1, T_P^2, \dots, T_P^{L-1})$  and  $O_N = (P_{N_1}^N, T_N^1, T_N^2, \dots, T_N^{L-1})$  are trained based on the 6mA sequences and non-6mA sequences in the training dataset. Figure 1B shows the prediction of a test sequence 'Seq=GTAT...AA' of 41 nucleotides. We calculate the probabilities  $P(\text{Seq}|O_P)$  and  $P(\text{Seq}|O_N)$  of generating the sequence 'Seq' under the model  $O_P$  and  $O_N$ , respectively; and then use the ratio of  $P(\text{Seq}|O_P)$  to  $P(\text{Seq}|O_N)$ , i.e. the likelihood ratio, to determine whether 'Seq' is a 6mA or non-6mA sequence. Here,  $P(\text{Seq}|O_N) = P_G^N \times p_{GT}^{N_1} \times p_{TA}^{N_2} \times p_{AT}^{N_3} \times \dots \times p_{AA}^{N_{40}}$  and  $P(\text{Seq}|O_P) = P_G^P \times p_{GT}^{P_1} \times p_{TA}^{P_2} \times p_{AT}^{P_3} \times \dots \times p_{AA}^{P_{40}}$ . If  $\text{Ratio} = P(\text{Seq}|O_P)/P(\text{Seq}|O_N) > 1$ , 'Seq' is classified as a 6mA sequence, otherwise a non-6mA sequence. Note that the likelihood ratio can be any non-negative value. One may also use the log-likelihood ratio for symmetry, whose natural threshold is zero instead of one.

### 2.3 Prediction accuracy assessment

The following measures are commonly used for classification performance evaluation: the total prediction accuracy (ACC), Specificity ( $S_p$ ), Sensitivity ( $S_n$ ) and the Mathew's correlation coefficient (MCC) (Matthews, 1975):

$$S_n = \frac{TP}{TP + FN}$$

$$S_p = \frac{TN}{TN + FP}$$

$$\text{ACC} = \frac{TP + TN}{TP + TN + FP + FN} \times 100\%$$

$$\text{MCC} = \frac{TP \times TN - FP \times FN}{\sqrt{(TP + FP) \times (TN + FN) \times (TP + FN) \times (TN + FP)}}$$

where  $TP$  is the number of real 6mA sequences identified correctly,  $FN$  is the number of 6mA sequences classified incorrectly,  $TN$  is the number of non-6mA sequences correctly identified and  $FP$  is the number of non-6mA sequences classified incorrectly.

### 3 Result and discussion

#### 3.1 Analysis of transition probability between adjacent nucleotides

In order to demonstrate the rationality of 6mA sequence recognition based on the MM, we show the difference of transition probabilities between adjacent nucleotides in 6mA and non-6mA sequences. Figure 2 shows that the transition probabilities of A to A and C to G were significantly different from the 12th to 33th site and the 16th to 37th site. The results indicated that the first-order Markov chain is informative for identifying sequences containing 6mA sites. However, the regions showing significant difference in transition probabilities of different nucleotide pairs are not the same. Thus, how to determine an appropriate region for classification is critical. Section 3.2 introduces the process of solving this problem in detail.

To simplify the calculation of *Ratio* and demonstrate the detail discriminant information, we show the values of all  $p_{N_i N_{i+1}}^i / p_{N_i N_{i+1}}^{N_i}$ ,  $i = 1, 2, \dots, 40$  in Fig. 3. The vector  $P_{N_i}^P / P^{N_i N}$  for the four nucleotides (A, G, C, T) is (1.09, 1.00, 0.91, 0.97) for the first position of the 41 nucleotides in the input dataset. In Fig. 3, if a value of  $p_{N_i N_{i+1}}^i / p_{N_i N_{i+1}}^{N_i}$  is close to 1, there is no difference between the corresponding transition probabilities from 6mA and non-6mA sequences. Figure 3 indicates that there is a significant difference in the transition probabilities among the regions from [22–23] to [27–28].

#### 3.2 Selection of the best subsequence region

Considering that not all the 41 nucleotides in the 6mA sequences and non-6mA sequences may provide classification information, we use a 10-fold cross-validation procedure to determine the best region. For the 41 sites, considering that the middle site has to be included, there are in total 400 possible continuous regions that can be used: [1, 22], [1, 23], ..., [1, 41]; [2, 22], [2, 23], ..., [2, 41]; ...;

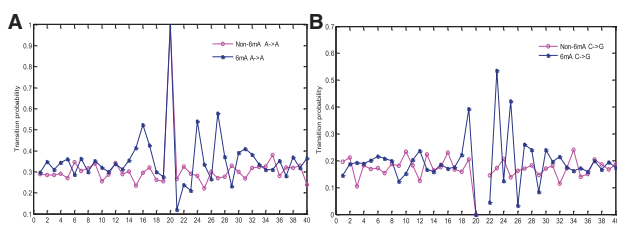

**Fig. 2.** Transition probabilities between adjacent nucleotides at all sites. The sub-figures (A) and (B) show the transition probabilities of the nucleotides A to A and C to G, respectively. The red and blue lines represent the 6mA and non-6mA sequences, respectively. In Fig. 2B, the C->G transition probability at Position 21 is undefined because the nucleotide at Position 21 is always A. (Color version of this figure is available at *Bioinformatics* online.)

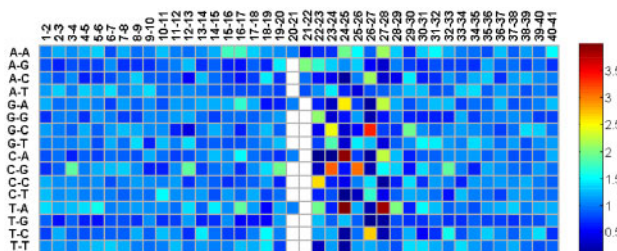

**Fig. 3.** The visualization of  $p_{N_i N_{i+1}}^i / p_{N_i N_{i+1}}^{N_i}$ . The variable names along the vertical axis represent the nucleotide pair  $N_i - N_{i+1}$  ( $N_i, N_{i+1} \in \{A, G, C, T\}$ ). The variable names along the horizontal axis represent the location pair  $i - i + 1$  ( $i = 1, 2, \dots, 40$ ). White squares in the figure represent undefined due to the fact that the 21st position of the input sequences is all A

[20, 22], [20, 23], ..., [20, 41]. The classification accuracy of every region can be calculated by a 10-fold cross-validation, which is shown in Fig. 4. The accuracy reaches the maximum (89.72%) at the region [3, 39]. Thus, in this study, [3, 39] is used as the best subsequence region.

#### 3.3 Comparison with other methods

So far, i6mA-Pred is the only existing identification algorithm for 6mA sequences. This method used an SVM classifier based on 164 features, which include nucleotide chemical properties and nucleotide frequencies. For the case of comparing i6mA-Pred with MM-6mA-Pred, we used the same 880 6mA sequences and 880 non-6mA sequences from the rice genome provided by the i6mA-Pred paper. For i6mA-Pred, the LibSVM package 3.18 (<http://www.csie.ntu.edu.tw/~cjlin/libsvm/>) is used to construct the SVM classifier. To be consistent with the i6mA-Pred paper, the kernel, cost (*C*) and gamma ( $\gamma$ ) of SVM are set to radial basis kernel function, 32 and 0.00048828125, respectively. We use the 10-fold cross-validation to measure the performance of i6mA-Pred and MM-6mA-Pred (see Table 1). The  $S_n$ ,  $S_p$  and ACC of MM-6mA-Pred are 89.32%, 90.11% and 89.72%, respectively. Our ACC is 6.59% higher than that of i6mA-Pred (83.13%). The results show that the transition probabilities between adjacent nucleotides can reflect better discriminant information.

To compare the two methods more systematically, the receiver operating characteristic (ROC) curves and precision recall curves (PRC) were plotted in Fig. 5. The area under curve of MM-6mA-Pred and i6mA-Pred are 0.9354 and 0.8948, respectively. The results show that our method outperforms i6mA-Pred.

The above performance evaluation and comparison are based on the benchmark dataset. One may also be interested in the performance on genome scale since there are a huge number of adenine sites in the genome, which are mostly non-6mA sites. Since 6mA seldom appears in coding sequences (CDSs), the adenine sites from CDSs were used to construct non-6mA sequences (Chen et al., 2019;

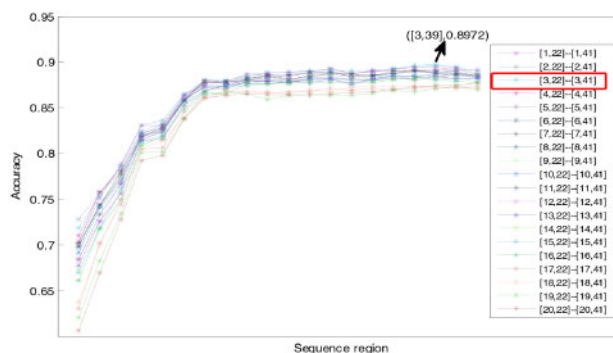

**Fig. 4.** The classification accuracies of 400 regions based on the 10-fold cross-validation. There are 20 lines of different colors in the figure, and the  $i$ -th line represents the regions  $[i, 22] - [i, 41]$ . The horizontal axis represents the number from 22 to 41. The region [3, 39], which has the highest ACC (0.8972), is located at the line for [3, 22]–[3, 41]

**Table 1.** Cross-validation accuracy of i6mA-Pred and MM-6mA-Pred based on the same dataset

| Method      | $S_n$ (%) | $S_p$ (%) | ACC (%) | MCC   |
|-------------|-----------|-----------|---------|-------|
| i6mA-Pred   | 82.95     | 83.30     | 83.13   | 0.662 |
| MM-6mA-Pred | 89.32     | 90.11     | 89.72   | 0.786 |

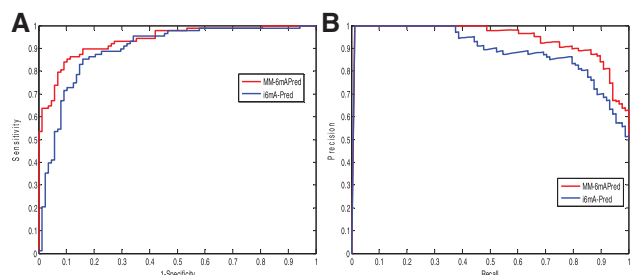

**Fig. 5.** (A) The ROC curves of MM-6mAPred and i6mA-Pred. (B) The PRC curves of MM-6mAPred and i6mA-Pred

Zhou *et al.*, 2018). Thus, we downloaded the rice CDSs (ZS97RS2.LNNJ00000000.CDS.v2.fa.gz) from <http://rice.hzau.edu.cn/rice/> (Song *et al.*, 2018), and compile a large negative dataset by randomly selecting 1000 rice CDSs, which obtains 314 711 adenine sites. With MM-6mAPred trained using the benchmark dataset, 50 141 (15.93%) sites were predicted to be 6mA sites. Among them, the 41 nt window of six predicted 6mA sites match exactly with some sequences in the 880 benchmark 6mA sequences. The information of the 1000 CDSs and the prediction results are provided in Supplementary Section S1. As a comparison, i6mA-Pred classified 64 853 (20.61%) of the sites as 6mA (see details in Supplementary Section S2). These results indicate that the performance of our method on the big negative dataset is better than that of i6mA-Pred, and the performance is consistent with those in Table 1.

When dealing with a large dataset, one may want to select a more stringent cutoff to reduce the false positives. MM-6mAPred actually has an advantage over i6mA-Pred on this aspect. As shown in Fig. 5, our method can still have a  $S_n$  around 0.55 when the false positive rate  $1 - S_p$  is controlled at 0.01, but the  $S_n$  of i6mA-Pred will decrease below 0.2 in this situation.

The  $\log(\text{Ratio})$  histograms in Fig. 6 also illustrate the discriminant information captured by MM-6mAPred. We can see that the distributions of the negative benchmark sequences and the CDS sequences are similar, and the distribution difference between positive sequences and negative sequences is obvious. Therefore, the users can select a small false positive rate error by moving the threshold to the right. If the false positive rate error on the 880 negative samples is set at 0.01, 2.27% of the CDS sites would be predicted as 6mA by MM-6mAPred (see details in Supplementary Section S1). As a comparison, i6mA-Pred would predict 20.61% of the CDS sites to be 6mA (see details in Supplementary Section S2). Therefore, MM-6mAPred will report much less false positive 6mA sites than i6mA-Pred for large datasets.

### 3.4 Application of program and web server

We developed a Matlab function (MM-6mAPred (Seq)) to identify the DNA 6mA sites from either 41 nt short sequences or a long genomic sequence.

(1) If the input sequence of the function M6-mAPred (Seq) is a short sequence of 41 nt (although we actually only use the region [3, 39]), the return results include the Location and Ratio of DNA 6mA site. For example:

```
Seq1='AATTGGATAGGGAGAAGCCGATGTAGCTGATTCTAGCAAGA'
```

```
[Ratio, Location, Class]=MM6mAPred(Seq1);
```

```
Output: Ratio = 33.2297; Location = 21, Class = 6mA
```

(2) For a sequence longer than 41 nt, the function scans all subsequences of 41 nt which have the nucleotide 'A' in the middle

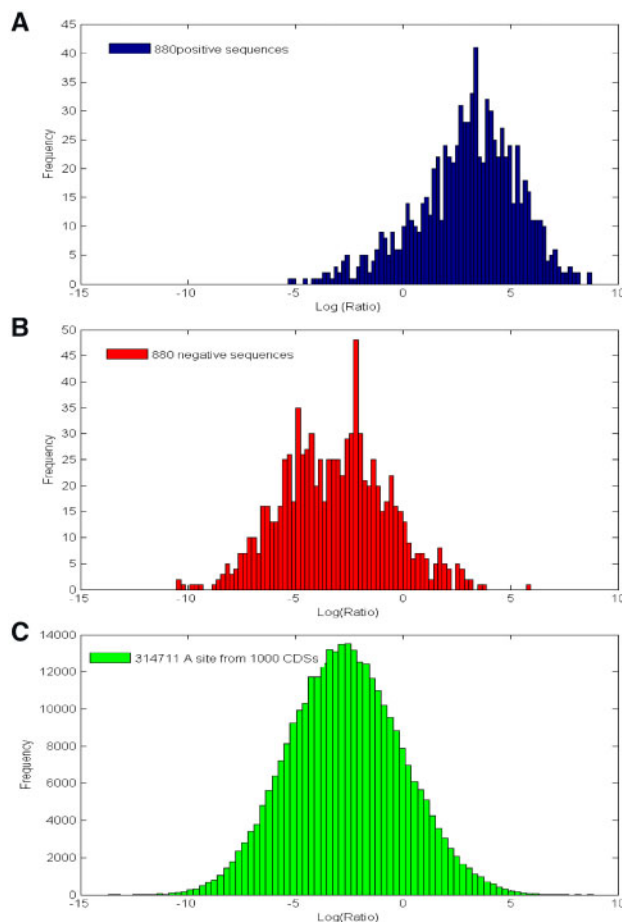

**Fig. 6.** The histograms of  $\log(\text{Ratio})$  from the 880 positive sequences (A), the 880 negative sequences (B) and the 314 711 adenine sites from the 1000 random CDSs (C), respectively

**Table 2.** The output of Seq2 under the function MM-6mAPred (Seq)

| Ratio    | 2.071 | 0.015   | 1.032 | 0.0391  | 0.128   |
|----------|-------|---------|-------|---------|---------|
| Location | 21    | 28      | 35    | 37      | 46      |
| Class    | 6mA   | Non-6mA | 6mA   | Non-6mA | Non-6mA |

(although we actually only use the region [3, 39]). Table 2 shows the output of Seq2 from the function call MM-6mAPred (Seq2). The results indicate that the 21th and 35th positions in Seq2 are identified as 6mA sites.

```
Seq2='AATTGGATAGGGAGAAGCCGATGTAGCTGATTCTAGCAAGAGTATATAACTTTTTTTCTTCAAGGCAGCAGGTGTC TGCTAAAACGGGTGGACGTCCACCCGAATGATTAGAATCCCTCTCCA'
```

```
[Ratio, Location, Class]=MM-6mAPred(Seq2);
```

In order to facilitate researchers to better use the MM-6mAPred to identify 6mA sites, we have established a user-friendly web server for MM-6mAPred. It is freely available at <http://www.insect-genome.com/MM-6mAPred/>. There are two forms for the input of our web tool. One is the sequences with length of 41, the other one is the sequences longer than 41. If the length of the sequence is longer or may even be a complete genome sequence, the second input form can be selected to predict the 6mA sites. Besides, users can paste FASTA format sequences into the text area or upload an FASTA

format file with your sequences. Finally, the uploaded sequences are predicted by pressing the 'submit' button. Waiting a moment and the identification results will be presented in web page.

## 4 Conclusion

The accurate identification of DNA 6mA sites is a necessary step before probing their biological functions. In this study, we proposed an MM called MM-6mAPred to identify 6mA sites computationally. The classification performance is evaluated by the 10-fold cross-validation. The results show that MM-6mAPred is obviously superior to the existing algorithm i6mA-Pred although less information is used. The success of MM-6mAPred indicates that the transition probability between adjacent nucleotides can capture more discriminant sequence information. The SVM method used by i6mA-Pred did not make use of this neighboring dependency information.

MM-6mAPred might also be improved in many aspects. For example, the procedure for selecting the best subsequence region may consider a wider window, such as 201nt instead of 41nt, if the benchmark 6mA sites can be uniquely matched to the genome for sequence extension purpose. The chosen region may also not necessarily a contiguous region. Instead, two or more disconnected areas may be chosen. The region selection criterion may also be revised to balance between the classification accuracy and the model complexity. Furthermore, one may extend our first-order MM to higher order in order to catch more dependency information.

## Funding

This work was supported by the National Key Research Development Program and Hong Kong Scholars Program [2016YFC1200600, 2017YFC1200602 and 2017-037], and three grants from the Research Grants Council of the Hong Kong Special Administrative Region, China (Theme-based Research Scheme T12-710/16-R; General Research Fund 14203915 and 14173817).

*Conflict of Interest:* none declared.

## References

- Almagor, H.A. (1983) A Markov analysis of DNA sequences. *J. Theor. Biol.*, **104**, 633–645.
- Borodovsky, M. et al. (1995) Detection of new genes in a bacterial genome using Markov models for three gene classes. *Nucleic Acids Res.*, **17**, 3554–3562.
- Chen, W. et al. (2019) i6mA-Pred: identifying DNA N6-methyladenine sites in the rice genome. *Bioinformatics*, **35**, 2796–2800.
- Durbin, R. et al. (1998) *Biological Sequence Analysis Probabilistic Models of Proteins and Nucleic Acids*. Cambridge University Press, Cambridge, UK.
- Fu, Y. et al. (2015) N6-methyldeoxyadenosine marks active transcription start sites in *Chlamydomonas*. *Cell*, **161**, 879–892.
- Greer, E.L. et al. (2015) DNA methylation on N6-adenine in *C. elegans*. *Cell*, **161**, 868–878.
- Janulaitis, A. et al. (1983) Cytosine modification in DNA by BCNI methylase yields N4-methylcytosine. *FEBS Lett.*, **161**, 131–134.
- Liu, J.Z. et al. (2016) Abundant DNA 6mA methylation during early embryogenesis of zebrafish and pig. *Nat. Commun.*, **7**, 13052.
- Matthews, B.W. (1975) Comparison of the predicted and observed secondary structure of T4 phage lysozyme. *Biochim. Biophys. Acta*, **405**, 442–451.
- Ohler, U. et al. (1999) Interpolated Markov chains for Eukaryotic promoter recognition. *Bioinformatics*, **15**, 362–369.
- Reese, M. et al. (1997) Improved splice site detection in genie. *J. Comput. Biol.*, **4**, 311–323.
- Song, J.M. et al. (2018) Rice Information GateWay (RIGW): a comprehensive bioinformatics platform for Indica rice genomes. *Mol. Plant*, **11**, 505–507.
- Unger, G. and Venner, H. (1966) Remarks on minor bases in spermatic deoxyribonucleic acid. *Hoppe-Seylers Z. Physiol. Chem.*, **344**, 280–283.
- Wren, J.D. et al. (2005) Markov model recognition and classification of DNA/protein sequences within large text databases. *Bioinformatics*, **21**, 4046–4053.
- Wu, T.P. et al. (2016) DNA methylation on N6-adenine in mammalian embryonic stem cells. *Nature*, **532**, 329–333.
- Xiao, C.L. et al. (2018) N-methyladenine DNA modification in the human genome. *Mol. Cell*, **71**, 306–318.
- Yakhnenko, O. et al. (2005) Discriminatively trained Markov model for sequence classification. In: *IEEE International Conference on Data Mining*.
- Yao, B. et al. (2017) DNA N6-methyladenine is dynamically regulated in the mouse brain following environmental stress. *Nat. Commun.*, **8**, 1122.
- Zhou, C. et al. (2018) Identification and analysis of adenine N6-methylation sites in the rice genome. *Nat. Plants*, **4**, 554–563.
- Zhang, G. et al. (2015) N6-methyladenine DNA modification in *Drosophila*. *Cell*, **161**, 893–906.
